# Supplementary material for: Glucocorticoids limit acute lung inflammation in concert with inflammatory stimuli by induction of SphK1
Source: PubMed Central journal article supplement (PMC4518295; doi:10.1038/ncomms8796), 2015-07-17
Supplement: ncomms8796-s1.pdf [file ncomms8796-s1.pdf]

## Supplementary Information

### Supplementary Figure 1

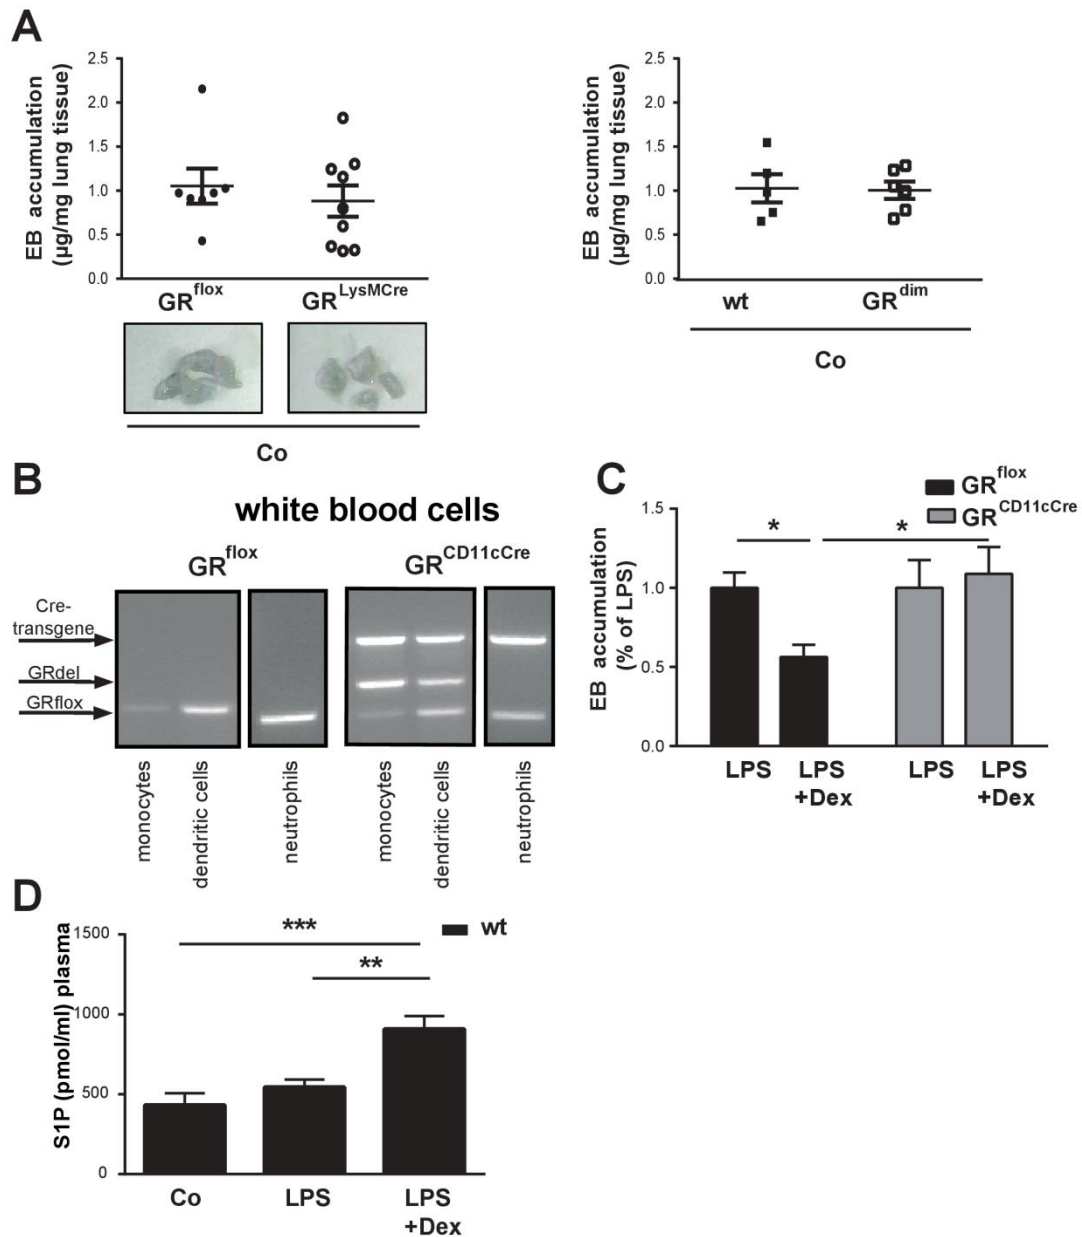

#### Supplementary Figure 1.

**EB accumulation in  $GR^{LysMCre}$ ,  $GR^{dim}$  and  $GR^{CD11cCre}$  mice, recombination of white blood cells in  $GR^{CD11cCre}$  mice and S1P plasma levels in wt mice.**

(A)  $GR^{flox}$  and  $GR^{LysMCre}$  mice and wild type (wt) and  $GR^{dim}$  mice were treated with vehicle (Co) for 18 h/24 h. Evans Blue dye (EB) was injected i.v. 30 min before sacrifice, then EB accumulation was quantified after perfusion (PBS + 5 mM EDTA). (B) From  $GR^{flox}$  and  $GR^{CD11cCre}$  mice white blood cells were sorted by flow cytometry for monocytes (CD115<sup>+</sup>; F4/80<sup>+</sup>; GR-1<sup>low</sup>; CD11c<sup>+</sup>), dendritic cells (CD115<sup>-</sup>; F4/80<sup>-</sup>; CD11c<sup>+</sup>) and neutrophils (GR-1<sup>+</sup>). PCR was subsequently performed on genomic DNA with primers amplifying the cre transgene (600 bp), the GRflox allele (275 bp) and the GR deleted allele (390 bp). (C)  $GR^{flox}$  and  $GR^{CD11cCre}$  mice were injected with LPS or LPS and Dex (LPS+Dex) for 18 h. EB was injected i.v. 30 min before sacrifice and quantified as described in Fig. 1A. (D) Wt mice were injected with vehicle (Co), LPS, or LPS+Dex. After 24 h, the S1P level in plasma (pmol/ml) was determined by LC/MS/MS. Results are presented as mean  $\pm$  SEM. Number of biological replicates: A (5–9), D (4–6), E (14–21). In (E) data are from six independent biological experiments. Statistical analysis was performed by one-way ANOVA. \*  $p < 0.05$ ; \*\*  $p < 0.01$ ; \*\*\*  $p < 0.001$ .

## Supplementary Figure 2

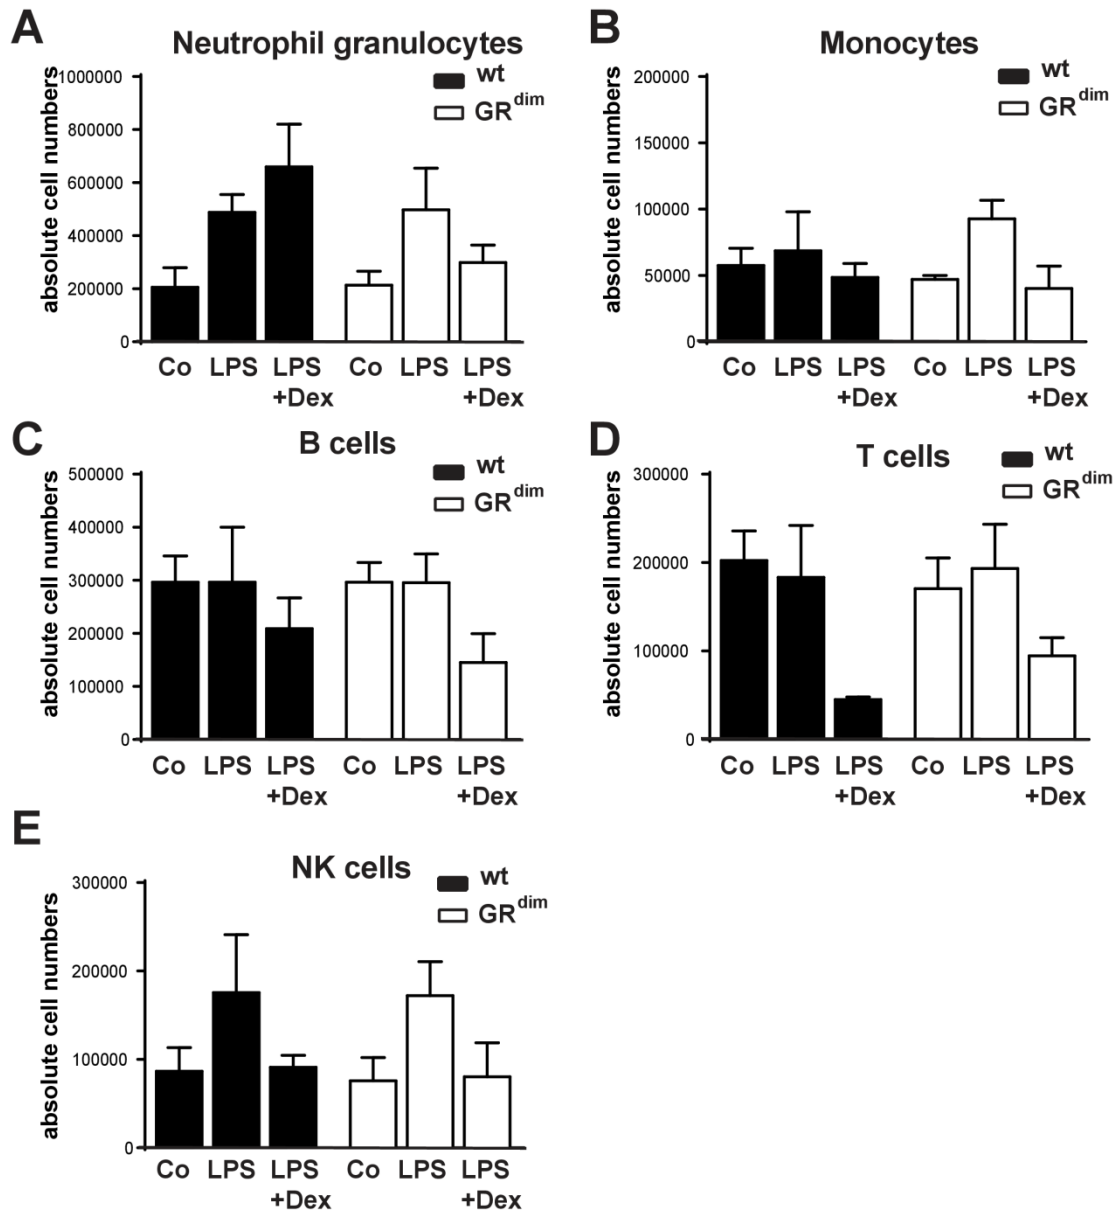

### Supplementary Figure 2.

#### *Leukocyte populations during ALI in wt and GR<sup>dim</sup> mice*

Wt and GR<sup>dim</sup> mice were treated as indicated in Fig. 1A. The abundance of individual leukocyte subpopulations in the blood was determined 24 h after the indicated treatments by flow cytometry in combination with cell counting using a haemocytometer. Absolute cell numbers of (A) neutrophil granulocytes (GR-1<sup>high</sup>), (B) monocytes (F4/80<sup>+</sup>, GR-1<sup>low</sup>), (C) B cells (CD45R/B220<sup>+</sup>), (D) T cells (CD3<sup>+</sup>) and (E) Natural killer (NK) cells (CD49b<sup>+</sup>) in 100  $\mu$ l blood are shown in the graphs. Data are depicted as mean  $\pm$  SEM. Number of biological replicates: 4 or 5 per group.

## Supplementary Figure 3

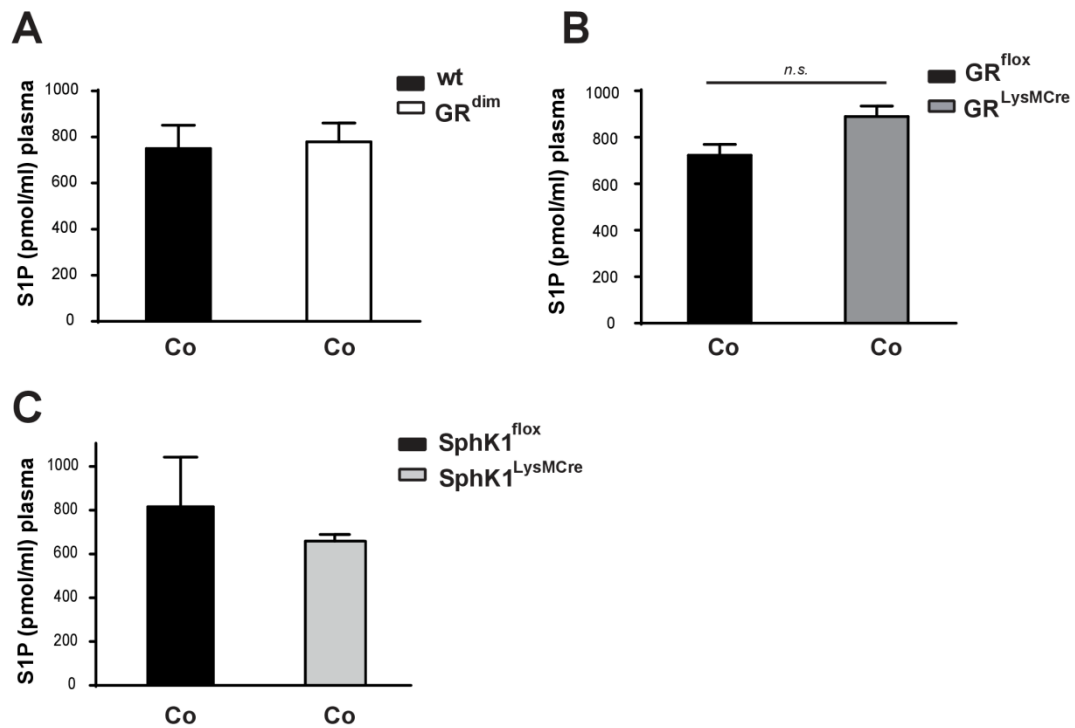

### Supplementary Figure 3.

#### **Basal S1P plasma levels in $GR^{dim}$ , $GR^{LysMCre}$ , $SphK1^{LysMCre}$ and the littermate control animals**

(A) The S1P level in plasma (pmol/ml) was determined in  $GR^{dim}$  and wt littermate control mice by LC/MS/MS 24 h after treatment with vehicle. (B) The S1P level in plasma (pmol/ml) was determined in  $GR^{lox}$  and  $GR^{LysMCre}$  mice by LC/MS/MS 18 h after treatment with vehicle. (C) The S1P level in plasma (pmol/ml) was determined in  $SphK1^{lox}$  and  $SphK1^{LysMCre}$  mice by LC/MS/MS 24 h after treatment with vehicle. Results are presented as mean  $\pm$  SEM. Number of biological replicates: A (11–13), B (5 or 6), C (6 or 7). Statistical analysis was performed by one-way ANOVA. n.s.: not significant.

## Supplementary Figure 4

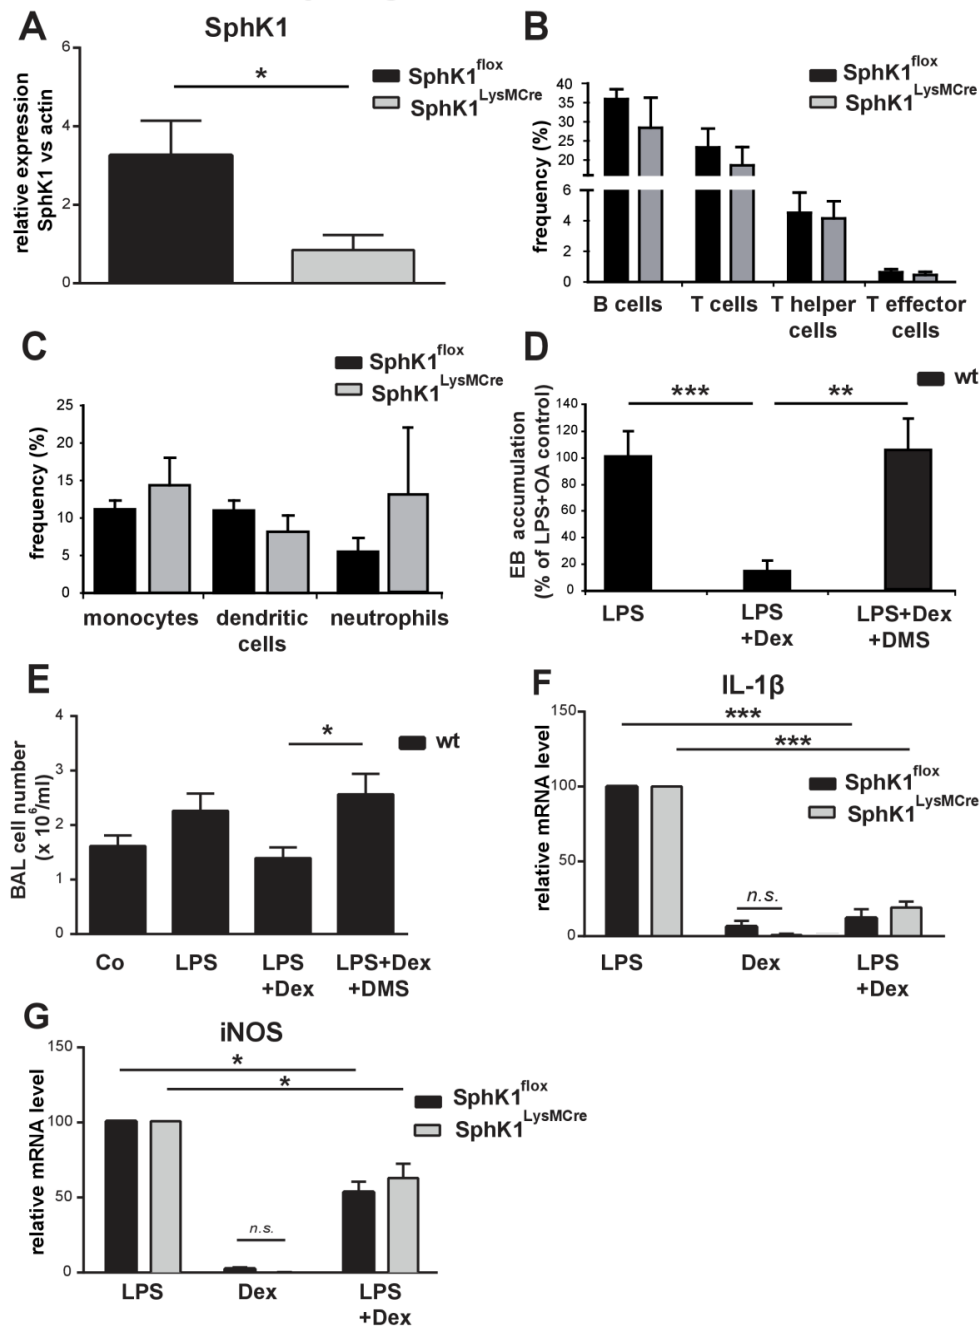

### Supplementary Figure 4.

#### Characterization of *SphK1<sup>LysMCre</sup>* mice and inhibition of *SphK1* in vivo

(A) BMDMs derived from *SphK1<sup>flox</sup>* and *SphK1<sup>LysMCre</sup>* mice were analysed for SphK1 mRNA expression by quantitative RT-PCR. (B, C) White blood cells from naive *SphK1<sup>flox</sup>* and *SphK1<sup>LysMCre</sup>* mice were analysed by flow cytometry (gated for lymphocytes and single cell frequency) for (B) lymphocytes: B cells (B220<sup>+</sup>), T cells (CD3<sup>+</sup>), T helper cells (CD3<sup>+</sup>; CD4<sup>+</sup>), T effector cells (CD3<sup>+</sup>; CD8<sup>+</sup>), and (C) myeloid cells: monocytes (CD115<sup>+</sup>; CD11b<sup>+</sup>), myeloid dendritic cells (CD11c<sup>+</sup>; CD11b<sup>+</sup>; CD115<sup>+</sup>), neutrophils (SSC<sup>high</sup>; GR-1<sup>high</sup>; CD11b<sup>+</sup>). (D, E) Wt mice were injected with LPS or LPS+Dex. An additional LPS+Dex-treated group received DMS (an SphK1 inhibitor) for a 24-h time period. (D) EB was injected 30 min before sacrifice and EB accumulation was quantified after perfusion (PBS + 5 mM EDTA). (E) Cell numbers in the bronchoalveolar lavage (BAL) obtained from mice 24 h after treatment with vehicle (Co), LPS, LPS+Dex, or LPS+Dex+DMS. (F, G) BMDMs derived from *SphK1<sup>flox</sup>* and *SphK1<sup>LysMCre</sup>* mice were treated for 4 h with LPS, Dex, or LPS+Dex and (F) IL-1 $\beta$  mRNA and (G) iNOS mRNA were analysed by quantitative RT-PCR. Values were normalized to those of LPS-treated cells. Results are presented as mean  $\pm$  SEM. Number of biological replicates: A (10 or 11), B (3), C (3), D (8–12), E (6 or 7), F and G (4 or 5). In (D) and (E) data are from two independent biological experiments. Statistical analysis was performed by one-way ANOVA. \*  $p < 0.05$ ; \*\*  $p < 0.01$ ; \*\*\*  $p < 0.001$ ; n.s.: not significant.

## Supplementary Figure 5

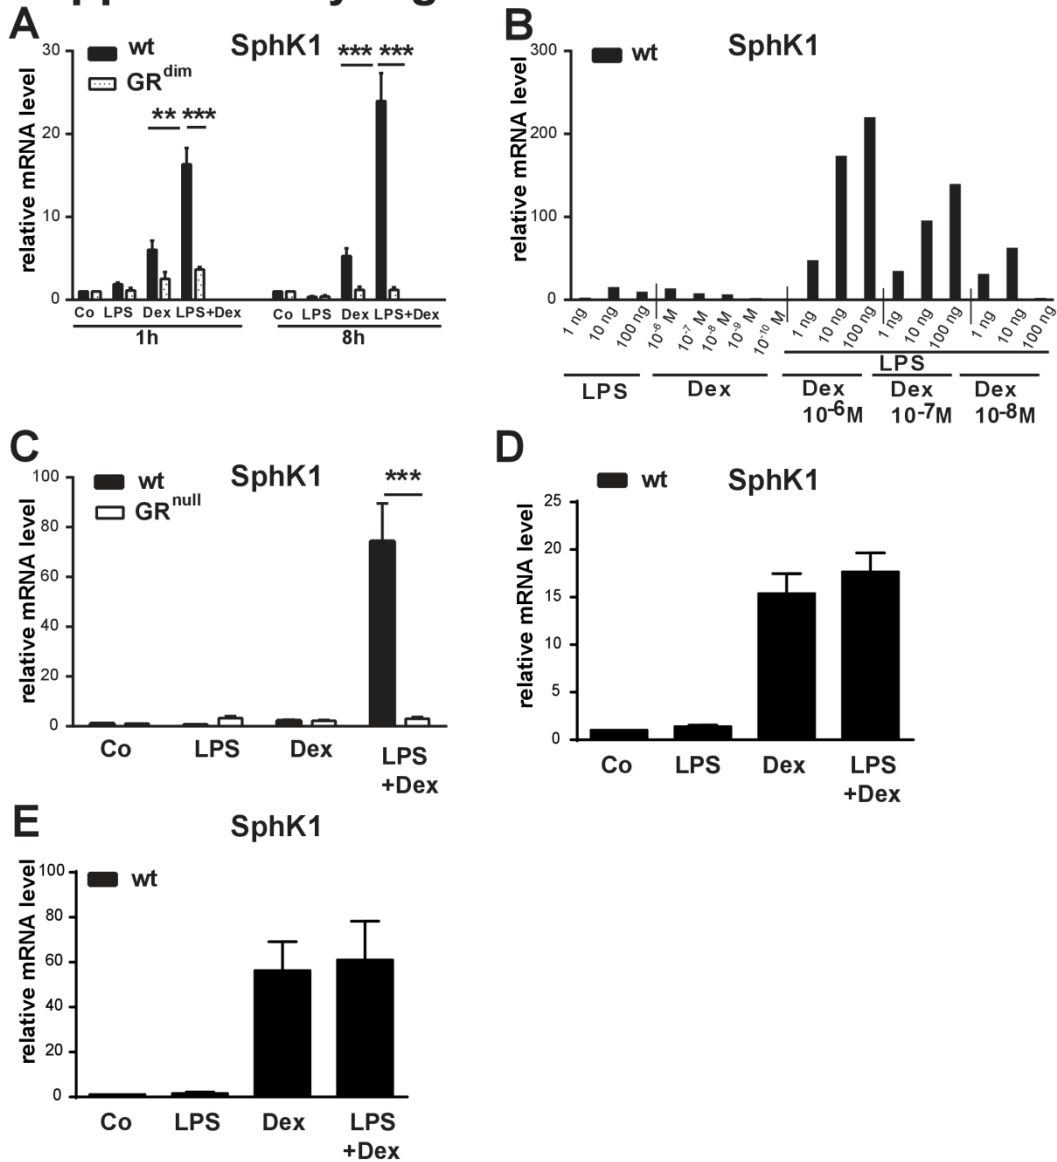

### Supplementary Figure 5.

#### *SphK1* expression in *GR<sup>dim</sup>* – and *GR<sup>null</sup>* –macrophages and in endothelial cells

(A) BMDMs derived from wt and *GR<sup>dim</sup>* mice were treated with vehicle (Co), LPS, Dex, or LPS+Dex for the indicated durations and SphK1 mRNA was analysed by quantitative RT-PCR. (B) BMDMs derived from wt mice were treated for 4 h with the indicated concentrations of LPS, Dex, or LPS+Dex, and mRNA levels of SphK1 were analysed by quantitative RT-PCR. (C) Macrophages derived from fetal liver of wt and *GR<sup>null</sup>* mice were treated with vehicle (Co), LPS, Dex, or LPS+Dex for 4 h and mRNA levels of SphK1 were analysed by quantitative RT-PCR. (D) Endothelial cell line TC10 was treated with vehicle (Co), LPS, Dex, or LPS+Dex for 4 h and SphK1 mRNA expression was analysed by quantitative RT-PCR. (E) Primary mouse lung endothelial cells were treated with vehicle (Co), LPS, Dex, or LPS+Dex for 4 h and SphK1 mRNA expression was analysed by quantitative RT-PCR. Results are presented as mean  $\pm$  SEM. Number of biological replicates: A (3–5), B (2 or 3), C (2 or 3), D (5), E (3). Statistical analysis was performed by one-way ANOVA. \*\*  $p < 0.01$ ; \*\*\*  $p < 0.001$ .

## Supplementary Figure 6

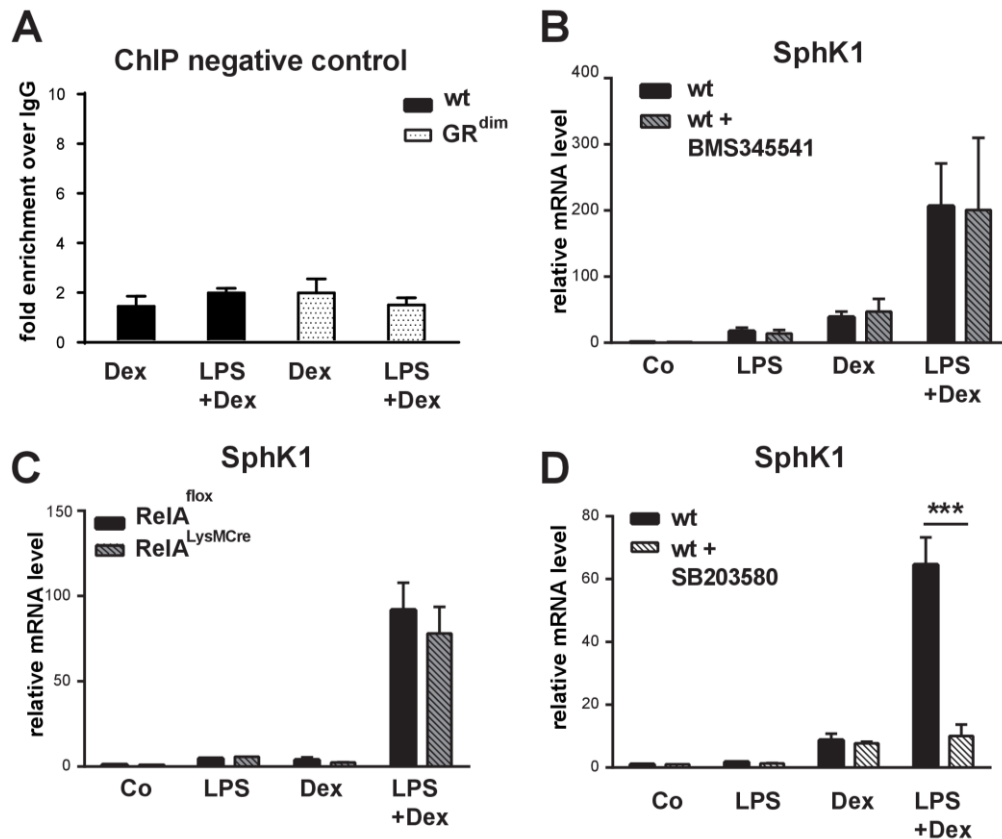

### Supplementary Information Figure 6.

#### ChIP from macrophages and SphK1 expression after p38, MSK1 inhibition and in RelA knock out macrophages

(A) Chromatin immunoprecipitation of wt and *GR<sup>dim</sup>* BMDMs was conducted 4 h after the indicated treatment (Dex, LPS+Dex). Shown are the quantitative RT-PCR results of the negative control (Foxl2). (B) BMDMs were treated for 2 h with vehicle (Co), LPS, Dex, or LPS+Dex in the presence or absence of 8  $\mu$ M BMS344551 (MSK1 inhibitor) and mRNA levels of SphK1 were analysed by quantitative RT-PCR. (C) BMDMs from *RelA<sup>flox</sup>* and *RelA<sup>LysMCre</sup>* mice were treated for 2 h with vehicle (Co), LPS, Dex, or LPS+Dex, and mRNA levels of SphK1 were measured as in (B). (D) BMDMs were treated for 4 h with vehicle (Co), LPS, Dex, or LPS+Dex in the presence or absence of 10  $\mu$ M SB203580 (p38 MAPK inhibitor) and SphK1 mRNA expression was analysed by quantitative RT-PCR. Results are presented as mean  $\pm$  SEM. Number of technical replicates: A (3). Number of biological replicates: B (4), C (2 or 3), D (3). Statistical analysis was performed by one-way ANOVA. \*\*\*  $p < 0.001$ .
